# Supplementary material for: Hydrophobic surface efficiently boosting Cu2O nanowires photoelectrochemical CO2reduction activity
Source: Royal Society of Chemistry journal article supplement (doi:10.1039/d3cc00825h), 2023-01-01
Supplement: d3cc00825h1.pdf [file d3cc00825h1.pdf]

## Supporting Information

### Hydrophobic Surface Efficiently Boosting Cu<sub>2</sub>O Nanowires Photoelectrochemical CO<sub>2</sub> Reduction Activity

Yanfang Zhang,<sup>a</sup> Weixin Qiu,<sup>a</sup> Yang Liu,<sup>a</sup> Keke Wang,<sup>a</sup> Luwei Zou,<sup>b</sup> Yu Zhou,<sup>b</sup>

Min Liu,<sup>b</sup> Xiaoqing Qiu,<sup>a</sup> Jie Li,<sup>a\*</sup> Wenzhang Li<sup>a,c\*</sup>

<sup>a</sup> School of Chemistry and Chemical Engineering, Central South University,  
Changsha, 410083, China

<sup>b</sup> School of Physics and Electronics, Central South University, Changsha 410083,  
China

<sup>c</sup> Hunan Provincial Key Laboratory of Chemical Power Sources, Central South  
University, Changsha, 410083, China

\* Corresponding authors.

E-mail addresses: liwenzhang@csu.edu.cn (Wenzhang Li), lijieliu@csu.edu.cn  
(Jie Li).

## Contents

### Experiment section

#### Figures

**Figure S1.** Illustration of the formation of  $\text{Cu}_2\text{O}$ ,  $\text{Cu}_2\text{O}/\text{Sn}$  and  $\text{Cu}_2\text{O}/\text{Sn}/\text{PTFE}$ .

**Figure S2.** The HRTEM images of  $\text{Cu}_2\text{O}/\text{Sn}/\text{PTFE}$ .

**Figure S3.** HAADF-STEM and EDX spectroscopy of  $\text{Cu}_2\text{O}/\text{Sn}/\text{PTFE}$ .

**Figure S4.** The XPS full spectrum of the photoelectrodes.

**Figure S5.** LSV curves of  $\text{Cu}_2\text{O}$ ,  $\text{Cu}_2\text{O}/\text{Sn}$  and  $\text{Cu}_2\text{O}/\text{Sn}/\text{PTFE}$ .

**Figure S6.** The product Faradaic efficiency of  $\text{Cu}_2\text{O}$  and  $\text{Cu}_2\text{O}/\text{Sn}$  at different potentials under light/dark.

**Figure S7.** a)-e) SEM images of photoelectrodes after immersion in different mass fractions of PTFE emulsion. f) Product Faradaic efficiency of photoelectrodes after immersion in different mass fractions of PTFE emulsion.

**Figure S8.** a)-e) SEM images of photoelectrode after soaking in 5 wt.% PTFE emulsion for different time. f) Product Faradaic efficiency of photoelectrode after soaking in 5 wt.% PTFE emulsion for different time (-0.7 V vs. RHE).

**Figure S9.** The product Faradaic efficiency of  $\text{Cu}_2\text{O}$ ,  $\text{Cu}_2\text{O}/\text{PTFE}$  and  $\text{Cu}_2\text{O}/\text{Sn}/\text{PTFE}$  at different potentials. a)  $\text{CO}$ , b)  $\text{H}_2$ .

**Figure S10.** The comparison of faradaic efficiency and yield of  $\text{Cu}_2\text{O}/\text{Sn}/\text{PTFE}$  photocathode under illumination and in the dark at different potentials.

**Figure S11.** The product Faradaic efficiency of  $\text{Cu}_2\text{O}/\text{Sn}/\text{PTFE}$  at KPi (-0.7 V vs. RHE).

**Figure S12.** a) The SEM image and b) the FT-IR spectrum of  $\text{Cu}_2\text{O}/\text{Sn}/\text{PTFE}$  after the  $\text{CO}_2\text{RR}$  for 1 h.

**Figure S13.** CV curves of the photocathodes a)  $\text{Cu}_2\text{O}$ , b)  $\text{Cu}_2\text{O}/\text{Sn}$  and c)  $\text{Cu}_2\text{O}/\text{Sn}/\text{PTFE}$ .

**Figure S14.** The CV curves of a)  $\text{Cu}_2\text{O}$ , b)  $\text{Cu}_2\text{O}/\text{Sn}$  and c)  $\text{Cu}_2\text{O}/\text{Sn}/\text{PTFE}$  under light in  $\text{CO}_2$ -saturated 0.1 M  $\text{KHCO}_3$  aqueous solution.

**Figure S15.** M-S plots measured at different frequencies for a)  $\text{Cu}_2\text{O}$ , b)  $\text{Cu}_2\text{O}/\text{Sn}$  and

c) Cu<sub>2</sub>O/Sn/PTFE. d) IMPS plots of Cu<sub>2</sub>O, Cu<sub>2</sub>O/Sn and Cu<sub>2</sub>O/Sn/PTFE.

**Figure S16.** The product Faradaic efficiency of Cu<sub>2</sub>O/Sn/PTFE at different pH electrolytes (-0.7 V vs. RHE).

### **Tables**

**Table S1.** The contents of each component in Cu<sub>2</sub>O/Sn/PTFE photoelectrode.

**Table S2.** Performance comparison of recent reports about Cu<sub>2</sub>O photocathode for PEC CO<sub>2</sub>RR.

**Table S3.** Physical resistance ( $R_1$ ), charge transfer resistance ( $R_{ct}$ ) and charge transfer efficiency of the photoelectrode.

## **Experiment section**

### **Preparation of Cu<sub>2</sub>O NWs Photocathode**

First, Cu(OH)<sub>2</sub> NWs were synthesized by anodizing in a two-electrode device. The polished copper foil was used as the working electrode, and the platinum sheet was used as the counter electrode, anodized in 3 M potassium hydroxide solution (3 M KOH) at a constant current of 10 mA/cm<sup>2</sup> for 8 min to obtain blue Cu(OH)<sub>2</sub> NWs. Then, the as-prepared Cu(OH)<sub>2</sub> NWs were calcined at 180 °C for 1 h to convert to CuO. Finally, the Cu<sub>2</sub>O NWs were obtained by annealing at 600 °C for 4 h in an Ar flowing atmosphere.

### **Preparation of Cu<sub>2</sub>O/Sn Photocathodes**

The Cu<sub>2</sub>O/Sn photocathode was synthesized by depositing 10 nm metal Sn on the Cu<sub>2</sub>O NWs photocathode by physical vapor deposition (PVD). The metal tin with a purity of 99.9% was used as the Sn source, and the evaporation rate was controlled to be 0.1 Å·s<sup>-1</sup>.

### **Preparation of Cu<sub>2</sub>O/Sn/PTFE Photocathode**

The surface of Cu<sub>2</sub>O/Sn electrode was further modified with PTFE (Poly tetra fluoroethylene) by dipping method to obtain Cu<sub>2</sub>O/Sn/PTFE photoelectrode. First, the 60 wt.% PTFE emulsion was diluted with water to obtain the desired weight percent (1%, 5%, 10%, 15% and 20%) of the PTFE emulsion, and ultrasonically dispersed it uniformly. Next, the Cu<sub>2</sub>O/Sn photocathodes were immersed in PTFE emulsions with different weight percent for different times to obtain the corresponding Cu<sub>2</sub>O/Sn/PTFE photoelectrodes. The photocathodes obtained by immersion in different weight percent

of PTFE emulsion for 1 min were named Cu<sub>2</sub>O/Sn/PTFE-1, Cu<sub>2</sub>O/Sn/PTFE, Cu<sub>2</sub>O/Sn/PTFE-10, Cu<sub>2</sub>O/Sn/PTFE-15 and Cu<sub>2</sub>O/Sn/PTFE-20, respectively. The photocathode obtained by dipping in 5 wt.% PTFE emulsion for 20 s, 40 s, 1 min, 3 min, 5 min are named Cu<sub>2</sub>O/Sn/PTFE-20 s, Cu<sub>2</sub>O/Sn/PTFE-40 s, Cu<sub>2</sub>O/Sn/PTFE-1min, Cu<sub>2</sub>O/Sn/PTFE-3min and Cu<sub>2</sub>O/Sn/PTFE-5min, respectively.

### **Morphology and structure characterization**

The crystal structures of the samples were recorded by X-ray diffractometer (XRD, D/Max2250, Rigaku) using Cu K $\alpha$  as radiation source ( $\lambda = 0.15406$  nm). Fourier transform infrared (FT-IR) spectra were collected on a Nicolet 6700 FT-IR spectrometer (Thermo, MA, USA) with the recorded wavenumbers from 400 to 4000 cm<sup>-1</sup>. TU-1901 UV-vis spectrophotometer with integrating sphere was used to record ultraviolet-visible absorption (UV-vis) spectra for analysis of optical properties. The contact angle (CA) of water (10  $\mu$ L) was determined using an OCA 20 instrument (Dataphysics, Germany). All CA images were collected within 0.5 min after water droplet being placed on the samples surface. Scanning electron microscopy (Nova Nano SEM 230, FEI) and high-resolution transmission electron microscopy (HRTEM, Tecnai G2 F20, FEI) were used to record the surface topography of the samples. X-ray photoelectron spectroscopy (XPS, Thermo Scientific K-Alpha+) with an Al-K $\alpha$  source was used to determine the elemental composition and valence state of the samples.

### **Photoelectrochemical measurements and CO<sub>2</sub> reduction performance**

PEC measurements were performed using an electrochemical workstation (Zahner) under AM 1.5 G illumination (100 mW cm<sup>-2</sup>). An H-type quartz cell was used,

isolated by a Nafion 117 proton exchange membrane, and the electrolyte was 0.1 M  $\text{KHCO}_3$  solution. Before the PEC  $\text{CO}_2\text{RR}$ ,  $\text{CO}_2$  (99.99%) was purged from the electrolyte in the cathodic compartment for 30 min. The prepared photocathode, platinum sheet and Ag/AgCl electrode were used as working electrode, counter electrode and reference electrode, respectively. Linear sweep voltammetry (LSV) was performed at a scan rate of 20 mV/s over a potential range of 0.2 V to -1.6 V vs. Ag/AgCl. The PEC  $\text{CO}_2\text{RR}$  product tests were performed at different potentials (-1.0, -1.1, -1.2, -1.3, -1.4 V vs. Ag/AgCl). The  $\text{CO}_2$  reduction products were analyzed by gas chromatograph (GC8860, Agilent, USA) and  $^1\text{H}$  NMR spectroscopy (HPLC, Agilent, USA).

Mott-Schottky (M-S) plots were recorded at different frequencies (1, 2, 3 kHz) over the potential range of 0 to -0.2 V vs. Ag/AgCl in the dark. Open circuit potential (OCP) was recorded under chopping illumination with 60 s light-on and 30 s light-off. Electrochemical impedance spectroscopy (EIS) was measured at -1.3 V vs. Ag/AgCl over a frequency range of 10 kHz to 100 mHz with an AC amplitude of 10 mV. Cyclic voltammetry (CV) curves were measured at different scan rates (20, 40, 60, 80, 100 mV s<sup>-1</sup>) from -0.15 to -0.05 V vs. Ag/AgCl. Intensity-modulated photocurrent spectroscopy (IMPS) was recorded by a Zahner CIMPS system at -0.5 V vs. Ag/AgCl over a frequency range of 5 kHz to 100 mHz. Convert the potential to a reversible hydrogen electrode (RHE) by the following formula:

$$E (\text{vs. RHE}) = E (\text{vs. Ag/AgCl}) + 0.059 \times \text{pH} + 0.197 \text{ V} \quad (1)$$

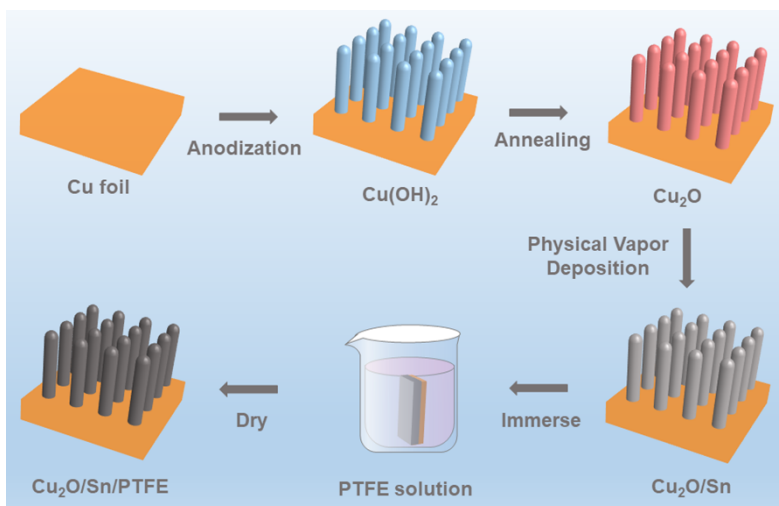

**Figure S1. Illustration of the formation of Cu<sub>2</sub>O, Cu<sub>2</sub>O/Sn and Cu<sub>2</sub>O/Sn/PTFE.**

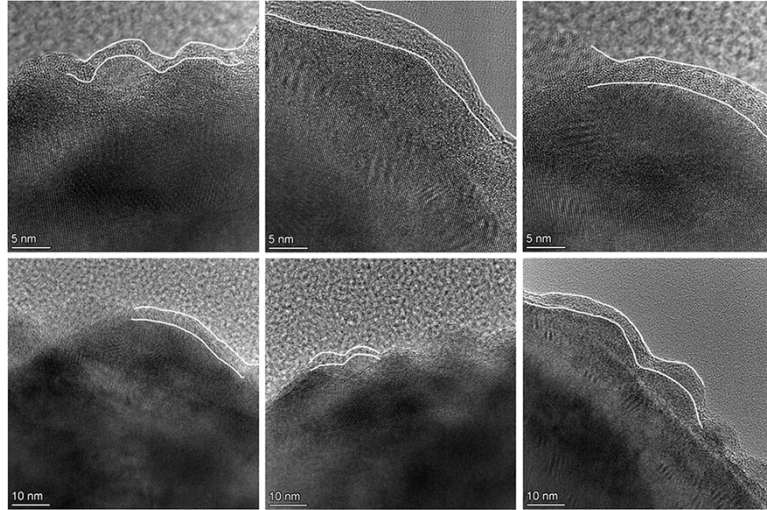

**Figure S2. The HRTEM images of  $\text{Cu}_2\text{O}/\text{Sn}/\text{PTFE}$ .**



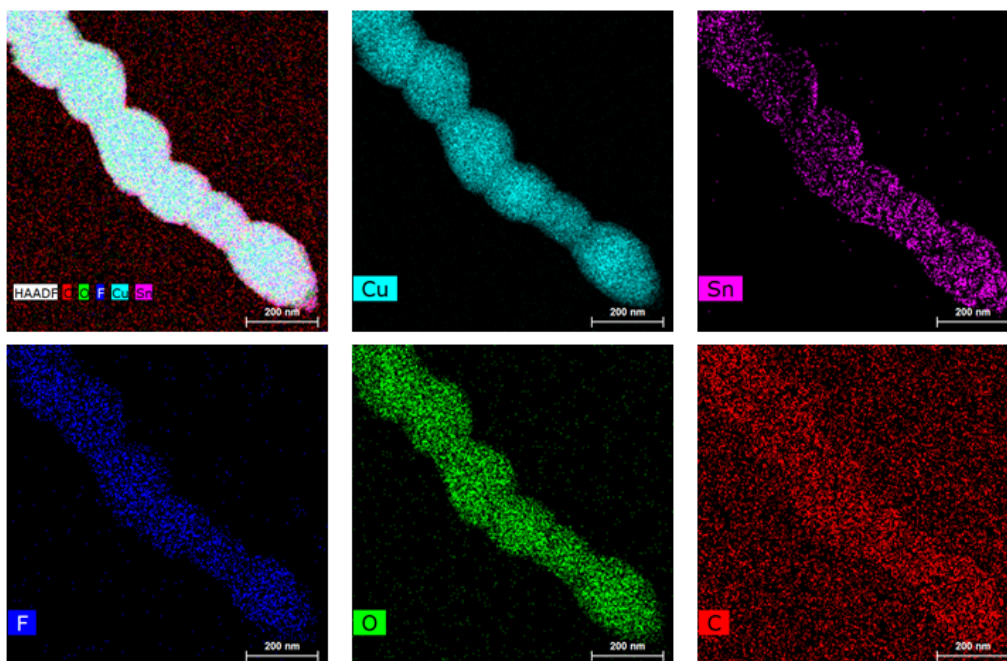

**Figure S3. HAADF-STEM and EDX spectroscopy of Cu<sub>2</sub>O/Sn/PTFE.**

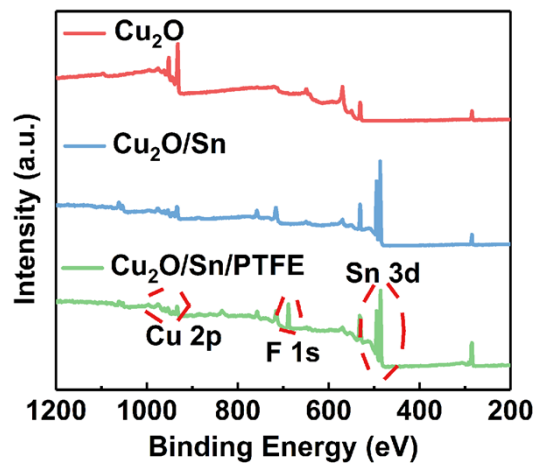

Figure S4. The XPS full spectrum of the photoelectrodes.

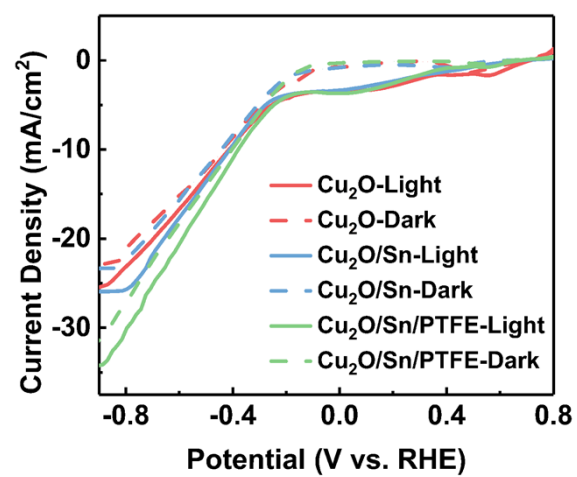

Figure S5. LSV curves of Cu<sub>2</sub>O, Cu<sub>2</sub>O/Sn and Cu<sub>2</sub>O/Sn/PTFE.

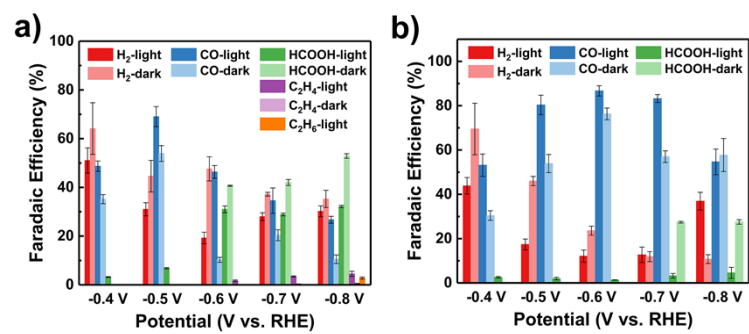

**Figure S6.** The product Faradaic efficiency of Cu<sub>2</sub>O and Cu<sub>2</sub>O/Sn at different potentials under light/dark.

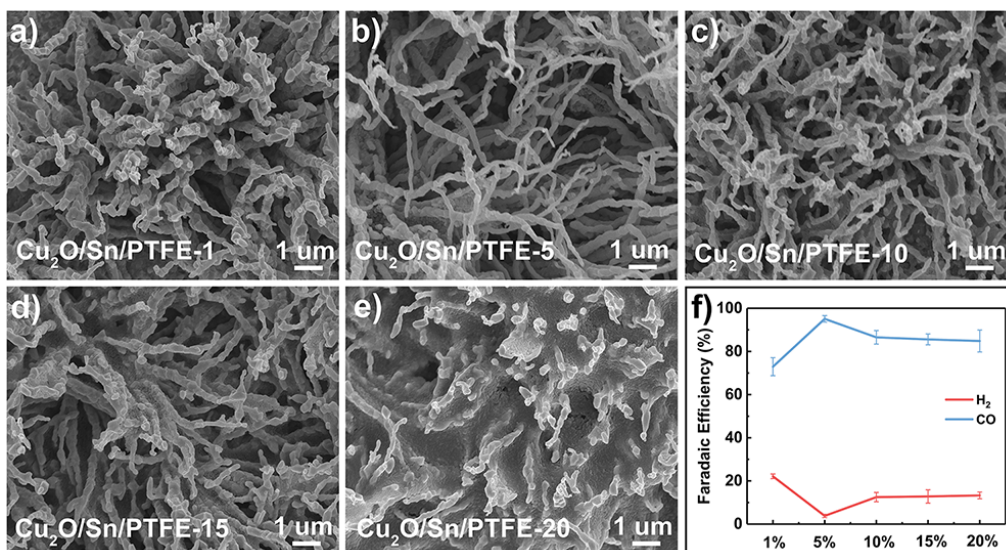

**Figure S7. a)-e) SEM images of photoelectrodes after immersion in different mass fractions of PTFE emulsion. f) Product Faradaic efficiency of photoelectrodes after immersion in different mass fractions of PTFE emulsion.**

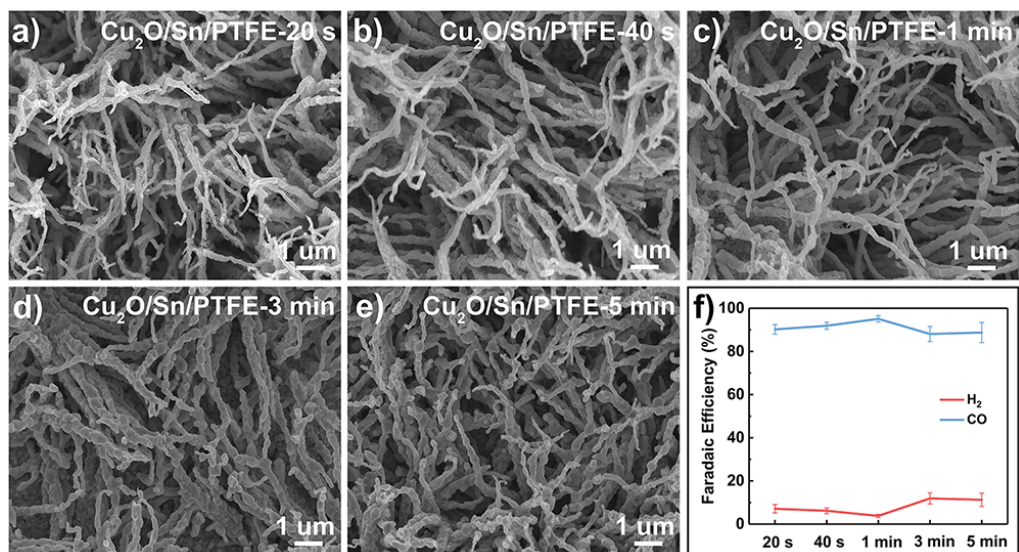

**Figure S8.** a)-e) SEM images of photoelectrode after soaking in 5 wt.% PTFE emulsion for different time. f) Product Faradaic efficiency of photoelectrode after soaking in 5 wt.% PTFE emulsion for different time (-0.7 V vs. RHE).

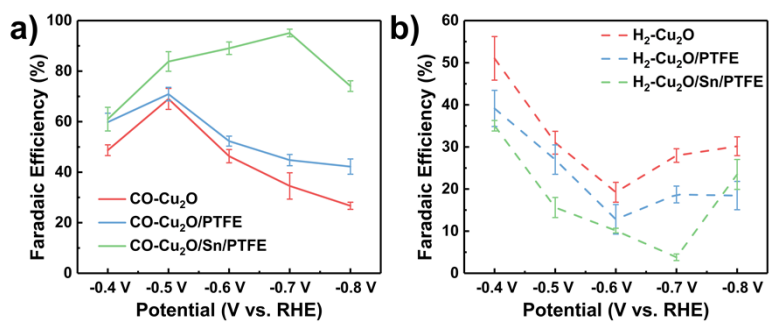

**Figure S9. The product Faradaic efficiency of Cu<sub>2</sub>O, Cu<sub>2</sub>O/PTFE and Cu<sub>2</sub>O/Sn/PTFE at different potentials. a) CO, b) H<sub>2</sub>.**

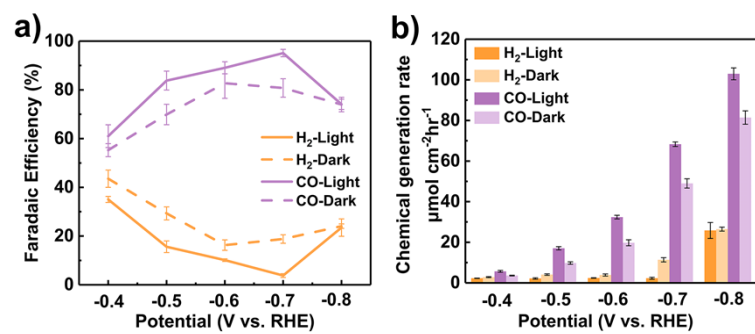

**Figure S10.** The comparison of faradaic efficiency and yield of Cu<sub>2</sub>O/Sn/PTFE photocathode under illumination and in the dark at different potentials.



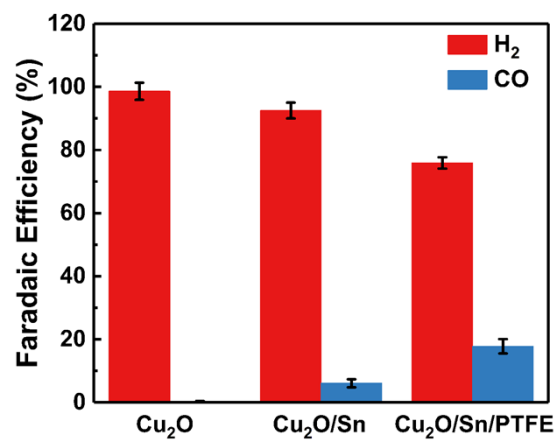

**Figure S11.** The product Faradaic efficiency of Cu<sub>2</sub>O/Sn/PTFE at KPi (-0.7 V vs. RHE).

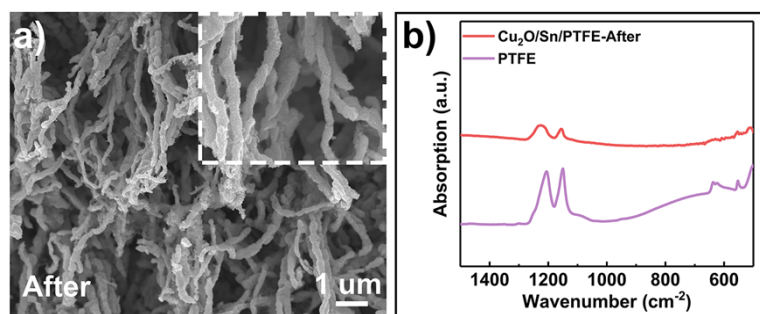

**Figure S12. a) The SEM image and b) the FT-IR spectrum of  $\text{Cu}_2\text{O/Sn/PTFE}$  after the  $\text{CO}_2\text{RR}$  for 1 h.**

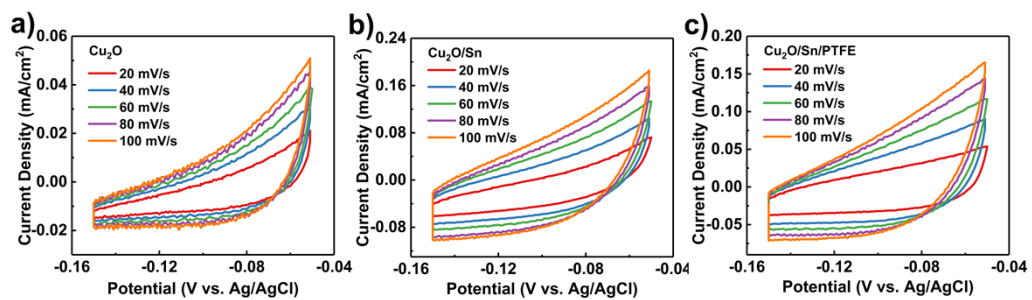

Figure S13. CV curves of the photocathodes a) Cu<sub>2</sub>O, b) Cu<sub>2</sub>O/Sn and c) Cu<sub>2</sub>O/Sn/PTFE.

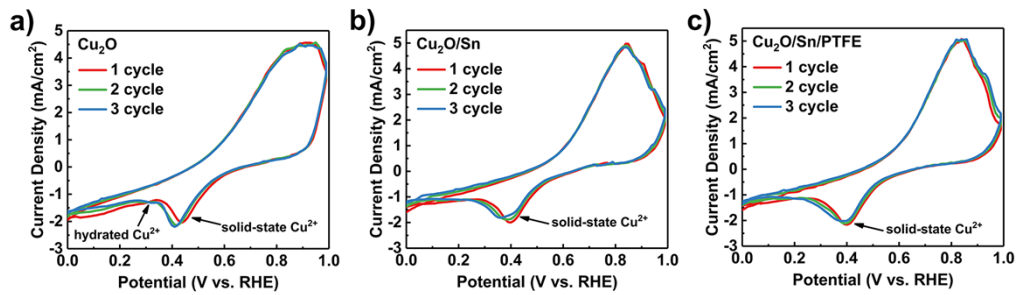

**Figure S14. The CV curves of a) Cu<sub>2</sub>O, b) Cu<sub>2</sub>O/Sn and c) Cu<sub>2</sub>O/Sn/PTFE under light in CO<sub>2</sub>-saturated 0.1 M KHCO<sub>3</sub> aqueous solution.**

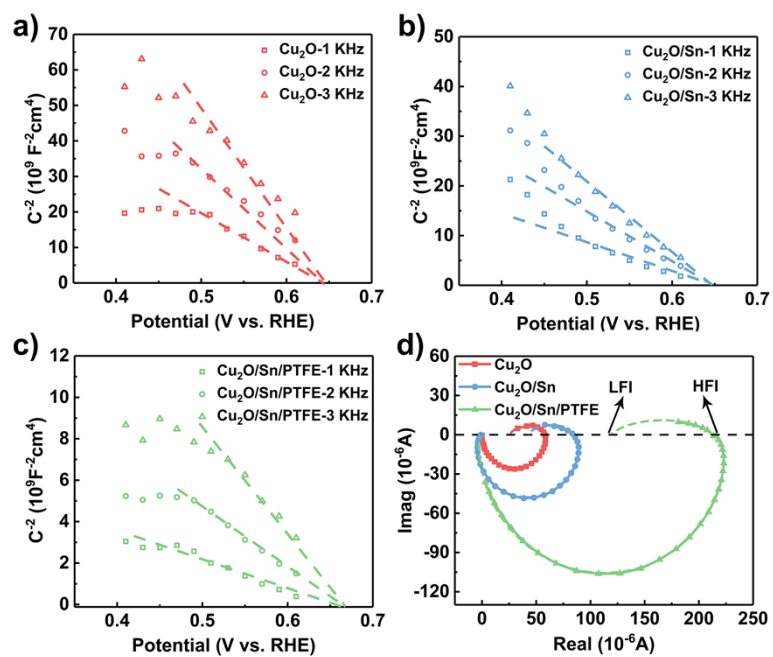

**Figure S15. M-S plots measured at different frequencies for a)  $\text{Cu}_2\text{O}$ , b)  $\text{Cu}_2\text{O}/\text{Sn}$  and c)  $\text{Cu}_2\text{O}/\text{Sn}/\text{PTFE}$ . d) IMPS plots of  $\text{Cu}_2\text{O}$ ,  $\text{Cu}_2\text{O}/\text{Sn}$  and  $\text{Cu}_2\text{O}/\text{Sn}/\text{PTFE}$ .**

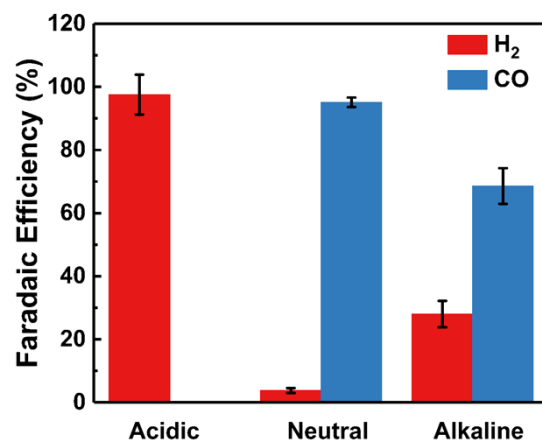

Figure S16. The product Faradaic efficiency of Cu<sub>2</sub>O/Sn/PTFE at different pH electrolytes (-0.7 V vs. RHE).

**Table S1. The contents of each component in Cu<sub>2</sub>O/Sn/PTFE photoelectrode.**

| Elements | ICP-MS(wt. %) | XPS(Atomic (%)) | Molar (%)                 |
|----------|---------------|-----------------|---------------------------|
| Cu       | 96.18         | /               | 99.00 (Cu <sub>2</sub> O) |
| Sn       | 0.79          | 44.44           | 0.87 (Sn)                 |
| F        | /             | 13.38           | 0.13 (PTFE)               |

**Table S2. Performance comparison of recent reports about Cu<sub>2</sub>O photocathode  
for PEC CO<sub>2</sub>RR.**

| Catalyst                                                                                                                    | Electrolyte                   | Potential                         | Products                     | FE           | Ref.                 |
|-----------------------------------------------------------------------------------------------------------------------------|-------------------------------|-----------------------------------|------------------------------|--------------|----------------------|
| Au/Cu <sub>2</sub> O/AZO/TiO <sub>2</sub> /<br>Re(4,4'-<br>dimethylphosphonic acid-<br>2,2'-bipyridine)(CO) <sub>3</sub> Cl | AcCN/TBAPF <sub>6</sub>       | -2.05 V vs.<br>Fc/Fc <sup>+</sup> | CO                           | 80%          | 1                    |
| Cu <sub>3</sub> (BTC) <sub>2</sub> /Cu <sub>2</sub> O                                                                       | AcCN/TBAPF <sub>6</sub>       | -1.77 V vs.<br>Fc/Fc <sup>+</sup> | CO                           | 95%          | 2                    |
| Cu <sub>2</sub> O/TiO <sub>2</sub> /Re(tBu-bipy)<br>(CO) <sub>3</sub> Cl                                                    | AcCN/TBAPF <sub>6</sub>       | -1.73 V vs.<br>Fc/Fc <sup>+</sup> | CO                           | 100%         | 3                    |
| Cu <sub>2</sub> O/TiO <sub>2</sub> -Cu <sup>+</sup>                                                                         | 0.1 M KHCO <sub>3</sub>       | 0.3 V vs. RHE                     | CH <sub>3</sub> OH           | 50.7%        | 4                    |
| Cu <sub>2</sub> O/In                                                                                                        | 0.1 M KHCO <sub>3</sub>       | -0.7 V vs.<br>RHE                 | CO                           | 81.8%        | 5                    |
| Cu <sub>2</sub> O/SnO <sub>x</sub>                                                                                          | 0.5 M NaHCO <sub>3</sub>      | -0.35 V vs.<br>RHE                | CO                           | 74%          | 6                    |
| Cu <sub>2</sub> O/CuO/Pb                                                                                                    | 0.1 M KOH                     | -1.6 V vs.<br>RHE                 | HCOOH,<br>CH <sub>3</sub> OH | 40.45%       | 7                    |
| <b>Cu<sub>2</sub>O/Sn/PTFE</b>                                                                                              | <b>0.1 M KHCO<sub>3</sub></b> | <b>-0.7 V vs.<br/>RHE</b>         | <b>CO</b>                    | <b>95.1%</b> | <b>This<br/>work</b> |

AcCN: acetonitrile;

TBAPF<sub>6</sub>: tetrabutylammonium hexafluorophosphate.



**Table S3. Physical resistance ( $R_1$ ), charge transfer resistance ( $R_{ct}$ ) and charge transfer efficiency of the photoelectrode.**

| Electrode                 | $R_1/\Omega$ | $R_{ct}/\Omega$ | Charge transfer efficiency/% |
|---------------------------|--------------|-----------------|------------------------------|
| Cu <sub>2</sub> O         | 24.33        | 32.63           | 47.0                         |
| Cu <sub>2</sub> O/Sn      | 23.58        | 29.01           | 52.5                         |
| Cu <sub>2</sub> O/Sn/PTFE | 22.88        | 30.83           | 53.9                         |

## Reference:

1. M. Schreier, J. Luo, P. Gao, T. Moehl, M. T. Mayer and M. Grätzel, *J. Am. Chem. Soc.*, 2016, **138**, 1938-1946.
2. X. Deng, R. Li, S. Wu, L. Wang, J. Hu, J. Ma, W. Jiang, N. Zhang, X. Zheng, C. Gao, L. Wang, Q. Zhang, J. Zhu and Y. Xiong, *J. Am. Chem. Soc.*, 2019, **141**, 10924-10929.
3. M. Schreier, P. Gao, M. T. Mayer, J. Luo, T. Moehl, M. K. Nazeeruddin, S. D. Tilley and M. Grätzel, *Energy Environ. Sci.*, 2015, **8**, 855-861.
4. K. Lee, S. Lee, H. Cho, S. Jeong, W. D. Kim, S. Lee and D. C. Lee, *J. Energy Chem.*, 2018, **27**, 264-270.
5. Q. Wang, Y. Zhang, Y. Liu, K. Wang, W. Qiu, L. Chen, J. Li and W. Li, *Ind. Eng. Chem. Res.*, 2022, **61**, 16470-16478.
6. Y. Zhang, D. Pan, Y. Tao, H. Shang, D. Zhang, G. Li and H. Li, *Adv. Funct. Mater.*, 2021, **32**, 2109600.
7. D. H. Won, C. H. Choi, J. Chung and S. I. Woo, *Appl. Catal. B*, 2014, **158-159**, 217-223.
